# Supplementary material for: Diets Differently Regulate Tumorigenesis in Young E0771 Syngeneic Breast Cancer Mouse Model
Source: MDPI journal article supplement (doi:10.3390/jcm12020413), 2023-01-04
Supplement: s1 [file s1]

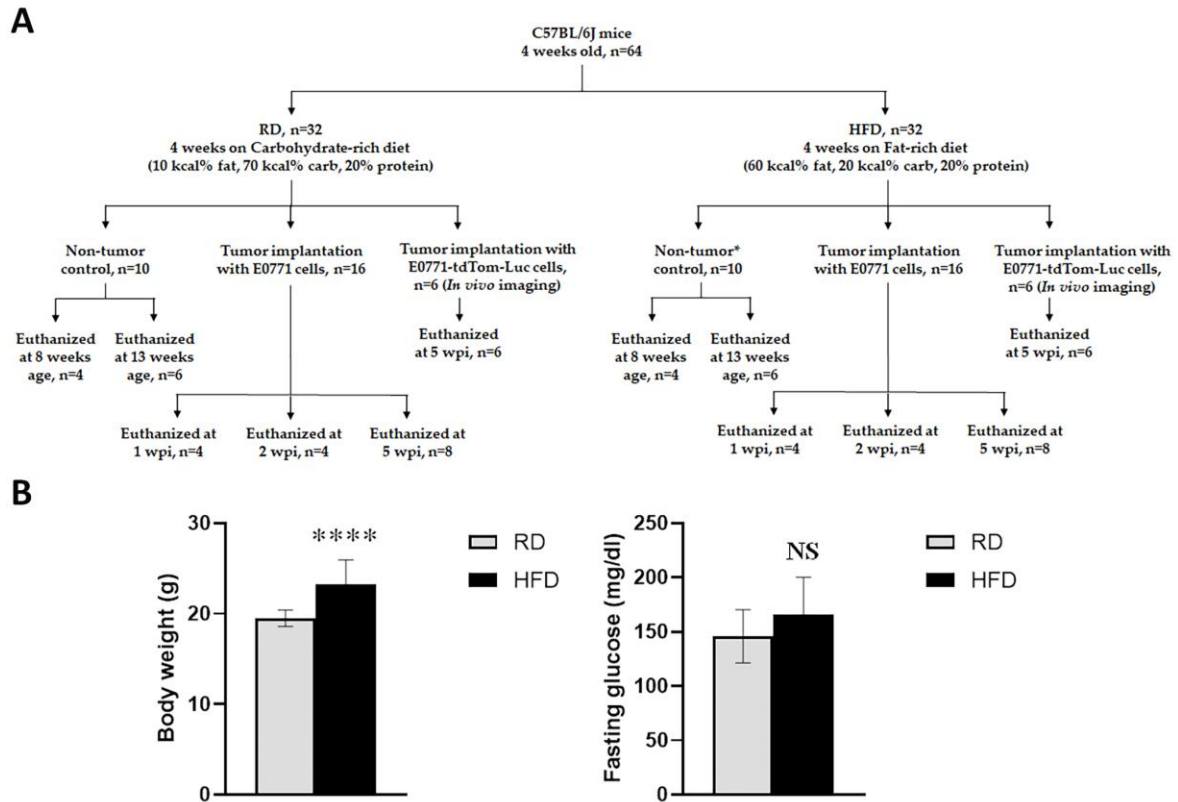

**Figure S1:** (a) Flowchart of the experimental design. (b) Bar graphs showing the change in body weight and fasting glucose levels in control mice after 4 weeks feeding on HFD compared to RD. The error bars represent the standard error of the mean. \*\*\*\*  $p \leq 0.0001$  and no significance (NS) compared to RD mice.

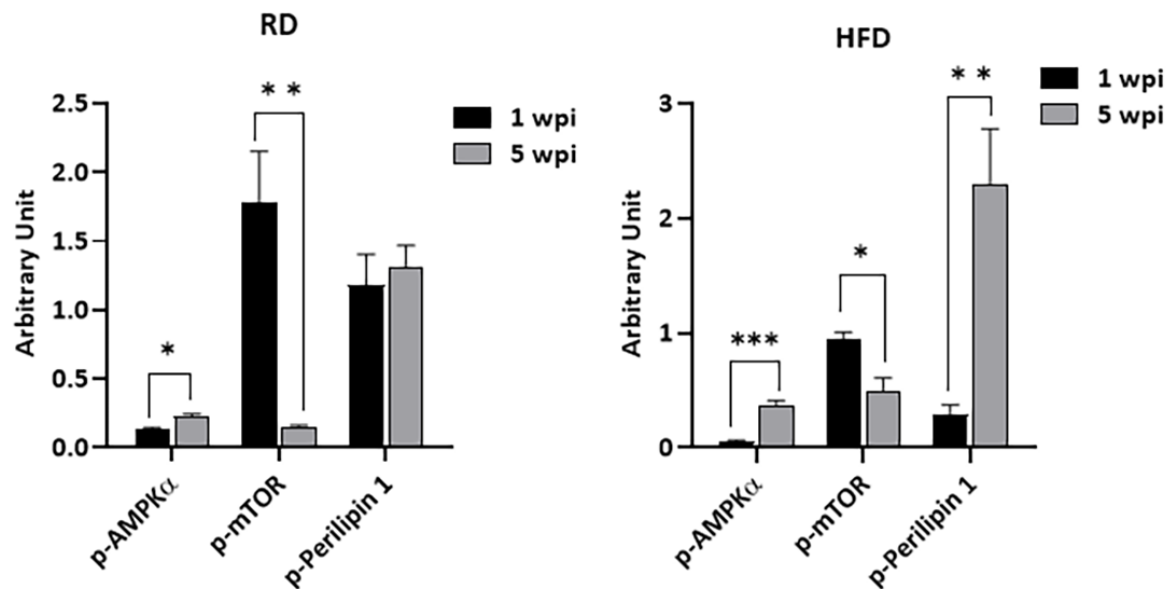

**Figure S2:** Bar graphs showing the levels of p-AMPKα, p-mTOR and p-Perilipin 1 normalized to β-Actin between 1 wpi and 5 wpi in both RD (left) and HFD (right) mice tumors. The error bars represent the standard error of the mean. \*  $p \leq 0.05$ , \*\*  $p < 0.005$  and \*\*\*  $p \leq 0.001$ .

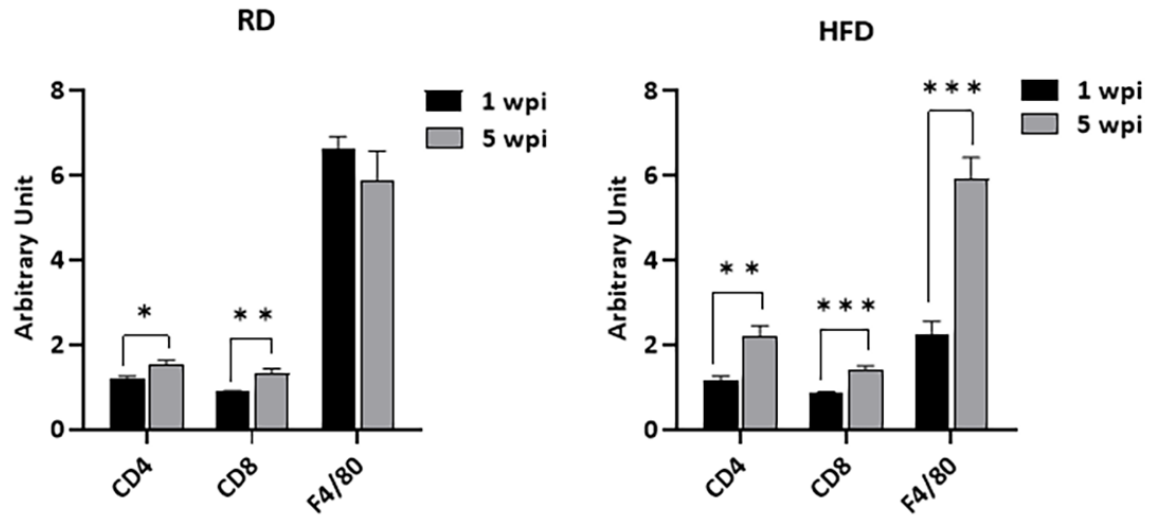

**Figure S3:** Bar graphs showing the levels of infiltrated immune cells (CD4, CD8 and F4/80 macrophages) normalized to  $\beta$ -Actin between 1 wpi and 5 wpi in both RD (left) and HFD (right) mice tumors. The error bars represent the standard error of the mean. \*  $p \leq 0.05$ , \*\*  $p < 0.005$  and \*\*\*  $p \leq 0.001$ .

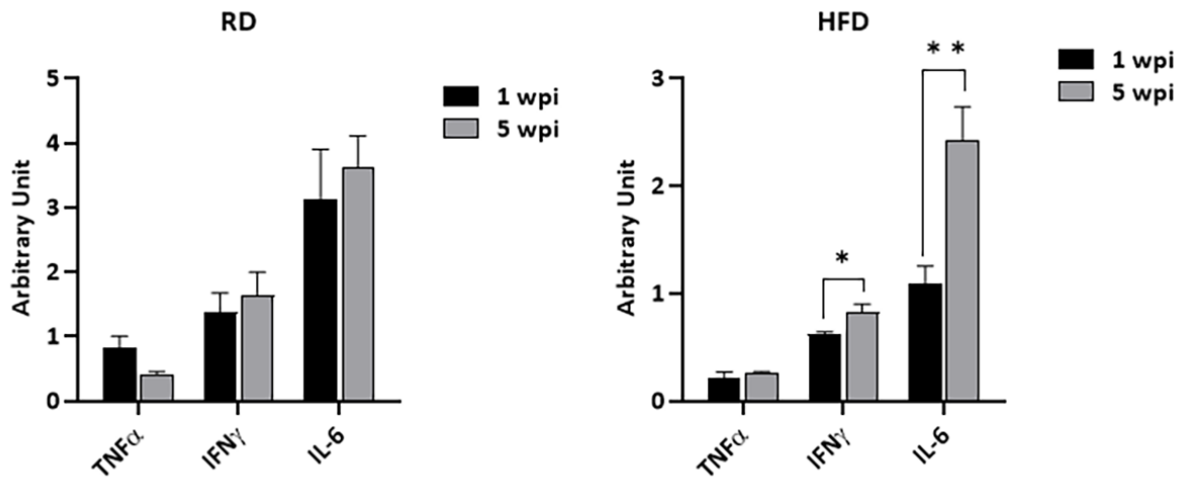

**Figure S4:** Bar graphs showing the levels of inflammatory markers (TNF $\alpha$ , IFN $\gamma$  and IL-6) normalized to  $\beta$ -Actin between 1 wpi and 5 wpi in both RD (left) and HFD (right) mice tumors. The error bars represent the standard error of the mean. \*  $p \leq 0.05$  and \*\*  $p \leq 0.005$ .

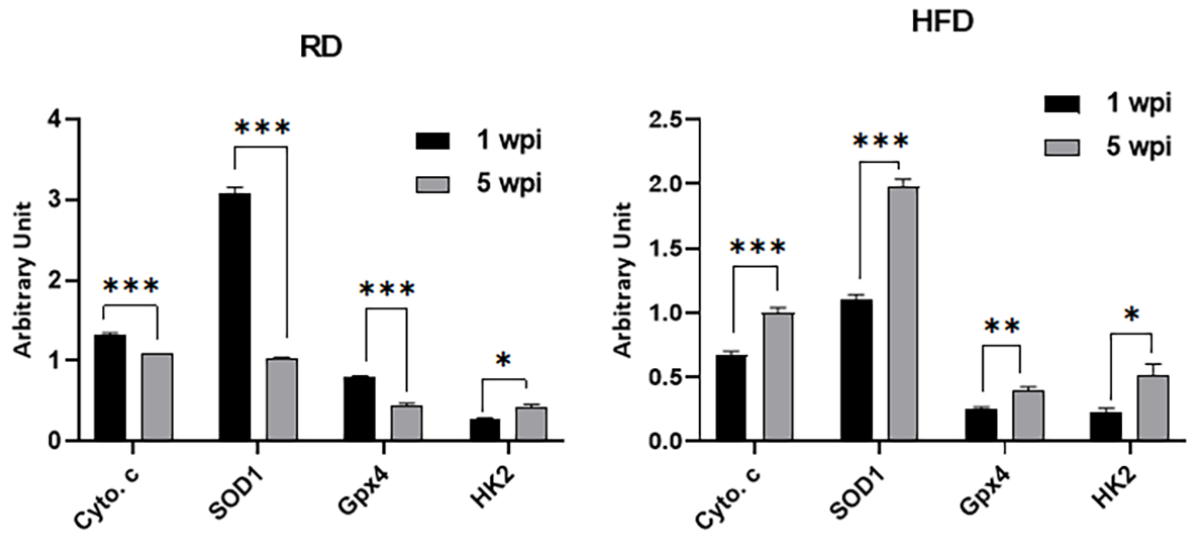

**Figure S5:** Bar graph showing the protein expression levels of energy metabolism (oxidative phosphorylation vs. glycolysis) normalized to  $\beta$ -Actin between 1 wpi and 5 wpi in both RD (left) and HFD (right) mice tumors. The error bars represent the standard error of the mean. \*  $p \leq 0.05$ , \*\*  $p \leq 0.005$  and \*\*\*  $p \leq 0.001$ .

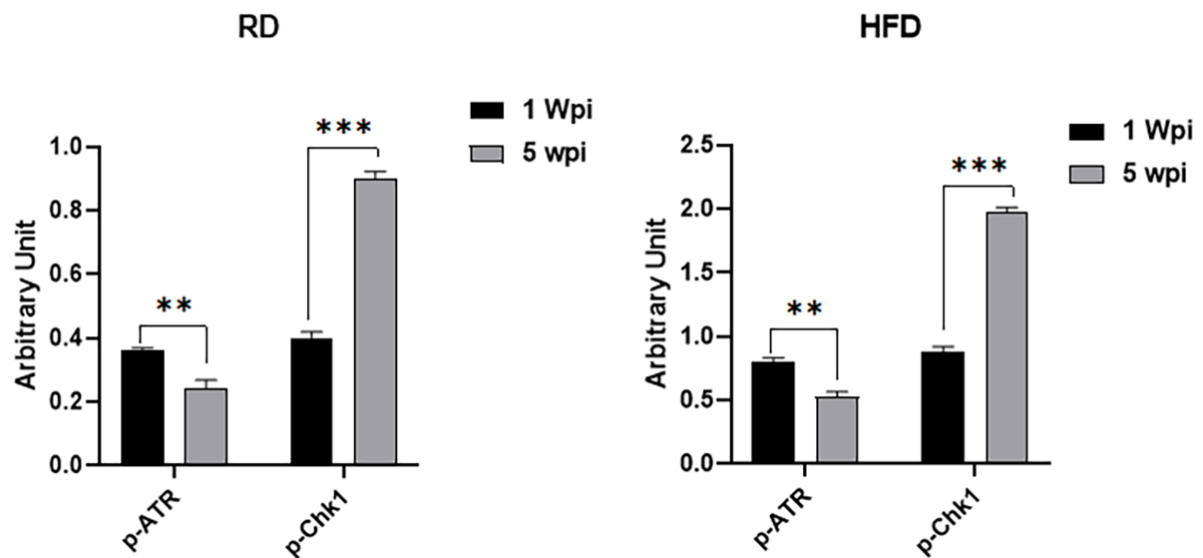

**Figure S6:** Bar graph showing the protein expression levels of DNA damage marker (p-Chk1 and p-ATR) normalized to  $\beta$ -Actin between 1 wpi and 5 wpi in both RD and HFD mice tumors. The error bars represent the standard error of the mean. \*\*  $p \leq 0.005$  and \*\*\*  $p \leq 0.001$ .
